# Supplementary material
Source: publisher figshare collection journal article supplement (https://diabetesjournals.figshare.com/articles/dataset/_/17099846)
Supplement: Supplementary file 1 [file 1]

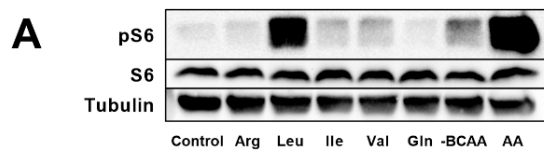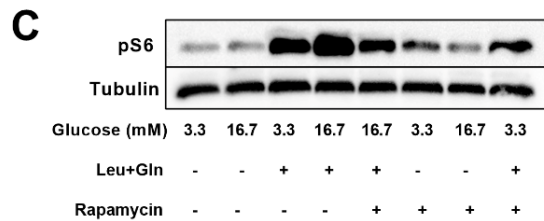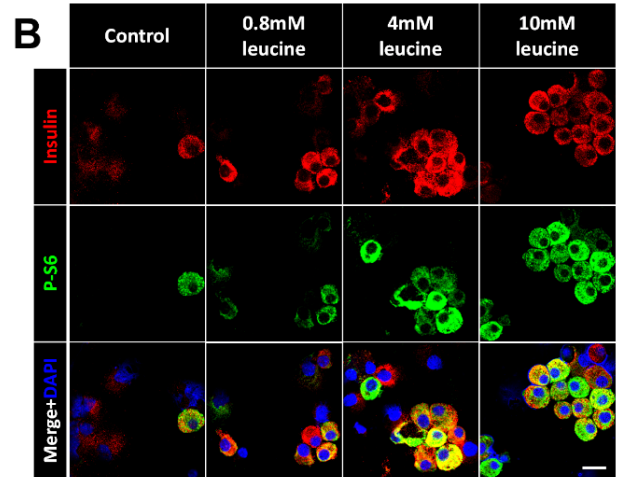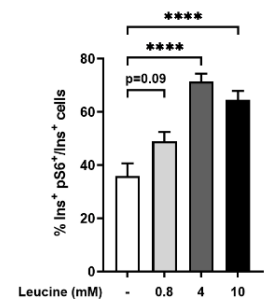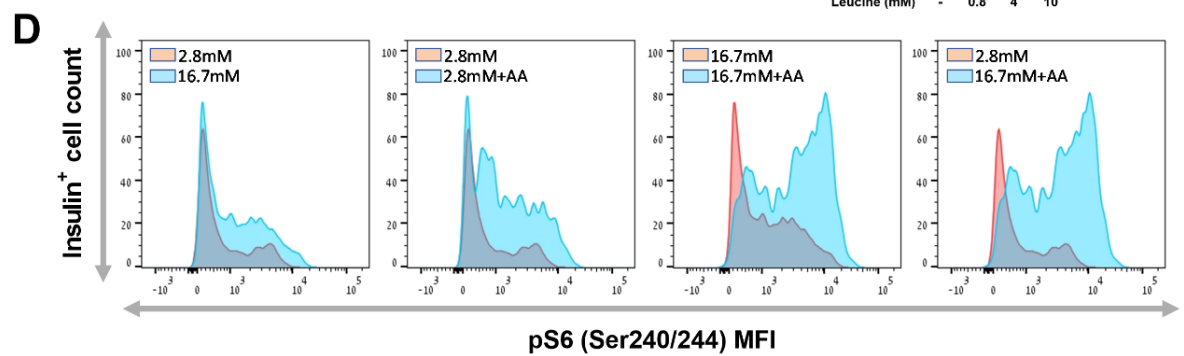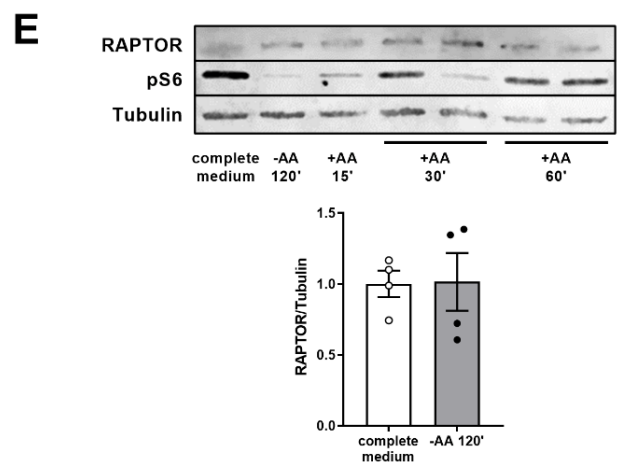

**Supplemental Figure 1: Regulation of mTORC1 by amino acids in INS-1  $\beta$ -cells and islets.** (A) INS-1 cells were preincubated for 30 min in AA-free RPMI at 3.3 mmol/l glucose without serum and then treated without or with the AAs arginine, leucine, isoleucine, valine, glutamine (10 mmol/l each), or in complete RPMI medium containing a mixture of all amino acids with or without BCAAs for 30 min followed by Western blotting for pS6, (Ser240/244), S6 and tubulin (n=2). (B) Islets were isolated from C57BL/6 mice, preincubated in AA-free RPMI with 3.3 mmol/l glucose with 10% FCS for 40 min and then treated with different concentrations of leucine for 30 min. Islets were dispersed and immunostained for insulin and pS6. Quantification of pS6 activity in  $\beta$ -cells is expressed as percentage of pS6<sup>+</sup>/insulin<sup>+</sup> cells. Scale bar: 20  $\mu$ m. n=4 separate experiments. (C) INS-1 cells were incubated at 3.3 or 16.7 mmol/l glucose with or without leucine + glutamine (10 mmol/l each) and rapamycin (100 nmol/l) for 1 h. pS6 (Ser240/244) was analyzed by Western blotting. Quantification is shown at the bottom; n=6. (D) Islets were treated at 2.8 or 16.7 mmol/l glucose with or without a mixture of all AAs for 30 min. mTORC1 activity, evident by S6 phosphorylation, was analyzed by flow cytometry, n=4. (E) Western blotting for RAPTOR and pS6 in mouse islets that were cultured in presence or absence of AAs for 2 h; AAs were added to starved cells for different periods of time; n=4.

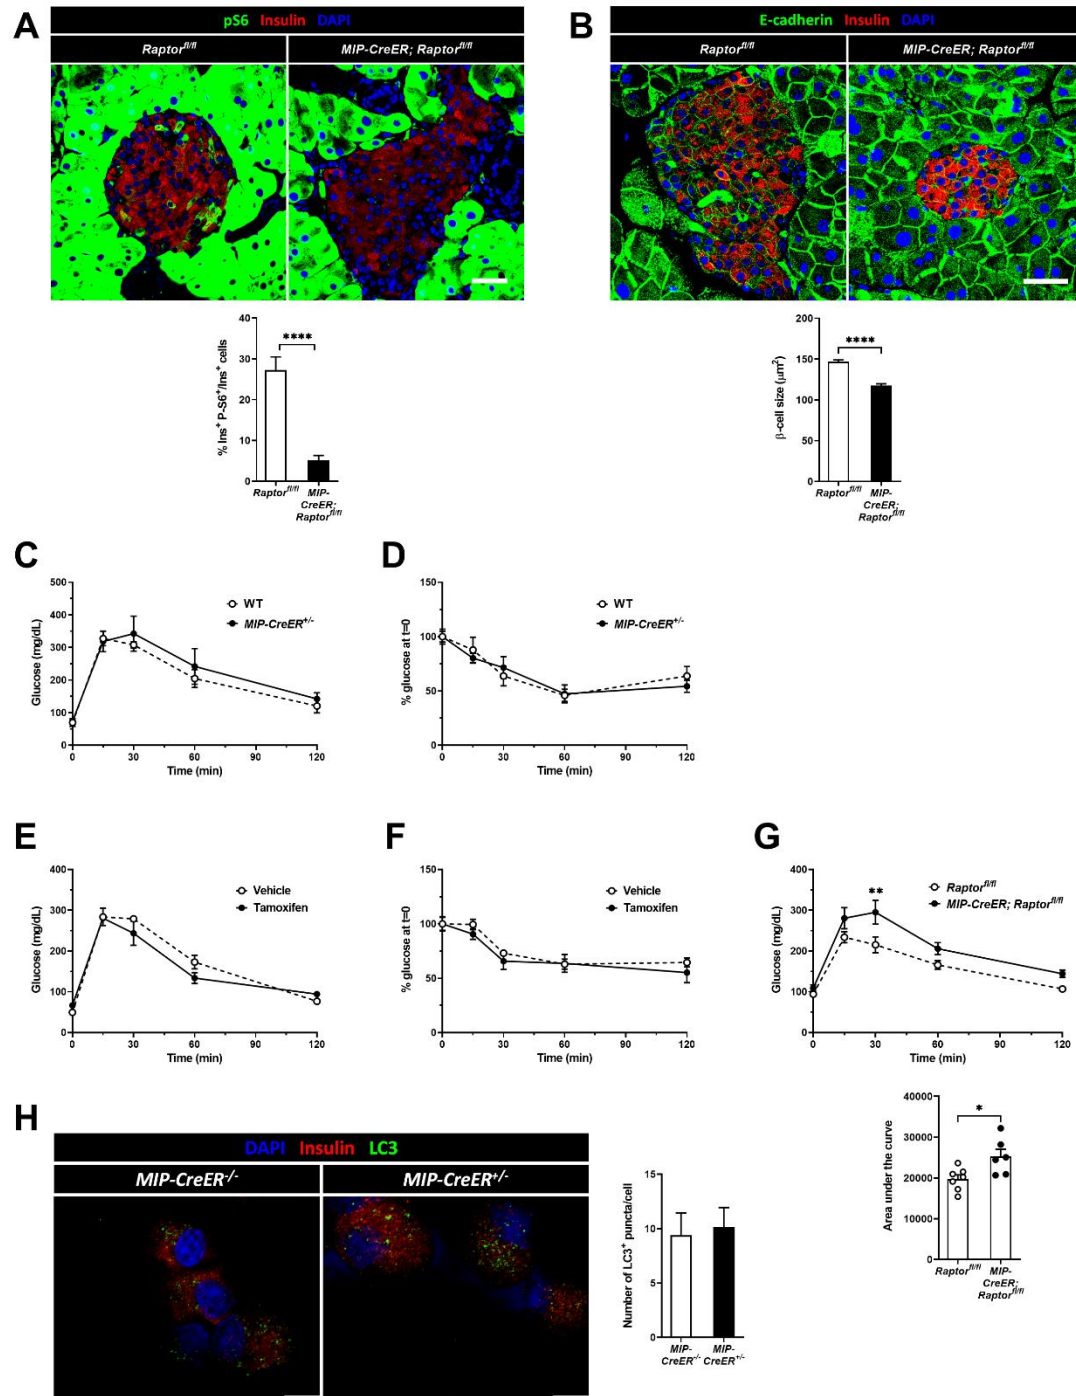

**Supplemental Figure 2: Cre recombinase and tamoxifen did not affect glucose tolerance and insulin sensitivity. Tamoxifen-induced *Raptor* KO in  $\beta$ -cells leads to mild glucose intolerance. (A-B) Control (*Raptor*<sup>fl/fl</sup>) and *MIP-CreER*; *Raptor*<sup>fl/fl</sup> mice were injected with tamoxifen. Two weeks later,**

pancreases were harvested, fixed and immunostained for insulin and pS6 (**A**) or E-cadherin (**B**). (**A**) n=2 separate experiments, 1400-3500 cells per group were counted; (**B**) n=550 cells per group. Scale bar: 40  $\mu$ m. (**C-D**) Wildtype (WT) and *MIP-CreER* mice were injected with tamoxifen, followed by IPGTT (C; 2 g/kg) and insulin tolerance test (D; 1 IU/kg, ITT) two weeks later, n=3 in each group. (**E-F**) *MIP-CreER* mice were injected with corn oil (vehicle) or tamoxifen, followed by IPGTT (**E**), and ITT (**F**), n=3 mice in each group. (**G**) Control (*Raptor<sup>fl/fl</sup>*) mice and *MIP-CreER; Raptor<sup>fl/fl</sup>* mice were injected with tamoxifen, followed by IPGTT two weeks later, n=6-10 mice in each group. (**H**) Effects of the MIP-CreER construct on  $\beta$ -cell autophagy. Wildtype and MIP-CreER islets were incubated at 3.3 mmol/l glucose and 1% serum with bafilomycin A1 for 2 h and stained for LC3. n=3 mice, 430 to 530 cells were counted in each group, Scale bar: 10  $\mu$ m

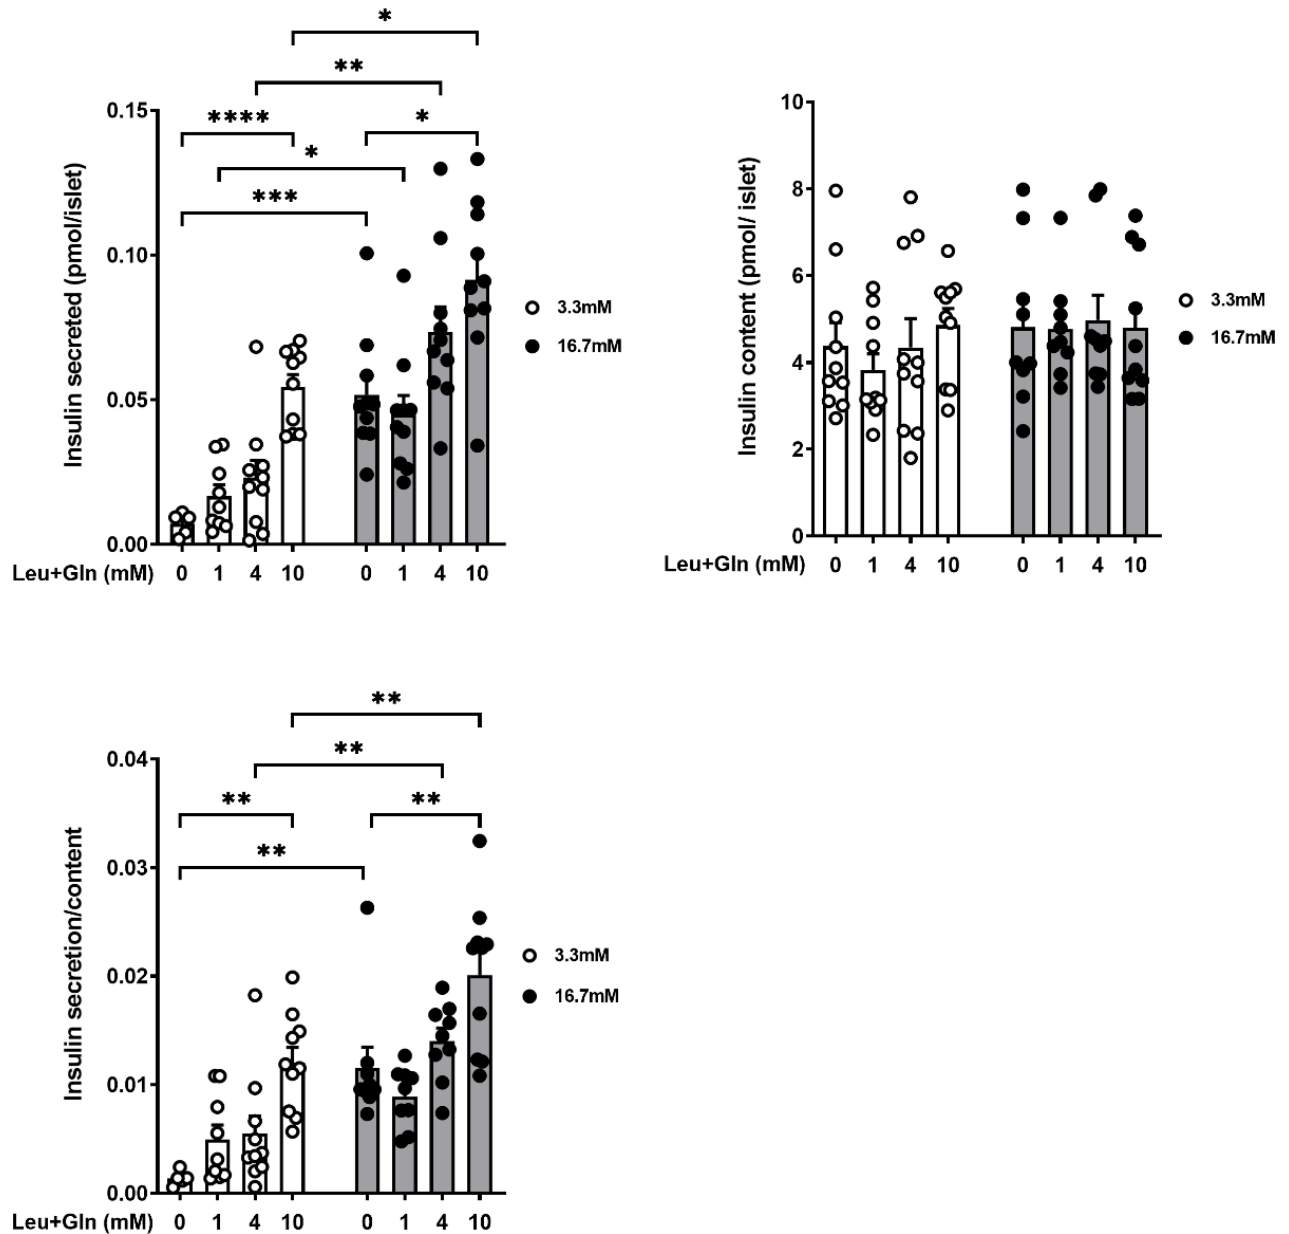

**Supplemental Figure 3. Concentration-dependent amplification of insulin secretion by amino acids.** Islets were preincubated in KRB medium and then treated with different concentrations of leucine and glutamine at 3.3 and 16.7 mmol/l glucose for 1 h. Insulin secretion and content were analyzed by ELISA. Results are means  $\pm$  SEM of 3 separate experiments in quadruplicates.

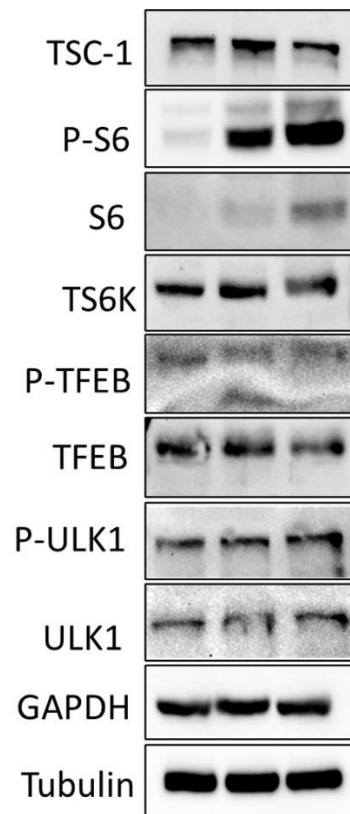

Glucose, mM: 3.3 16.7 3.3  
 Leucine, 10mM: - - +

|              |   |      |       |
|--------------|---|------|-------|
| P-S6/Tubulin | 1 | 6.35 | 13.29 |
| S6/Tubulin   | 1 | 1.65 | 1.98  |
| P-S6/S6      | 1 | 3.83 | 6.71  |
| P-TFEB/GAPDH | 1 | 0.89 | 0.92  |
| TFEB/GAPDH   | 1 | 0.92 | 0.77  |
| P-TFEB/TFEB  | 1 | 0.87 | 1.02  |
| P-ULK1/GAPDH | 1 | 1.2  | 1.94  |
| ULK1/GAPDH   | 1 | 1.27 | 1.01  |
| P-ULK1/ULK1  | 1 | 0.84 | 1.65  |

**Supplemental Figure 4. Effects of leucine and glucose on the activation of mTORC1 and of autophagy regulators.** Islets from 18 mice were isolated, pooled and incubated overnight in complete RPMI. Islets were pre-incubated at 3.3 mmol/l glucose in absence of AAs and serum and then incubated in medium containing 1% serum and 3.3 mmol/l glucose, 16.7 mmol/l glucose or 10 mmol/l leucine for 1 h. Islet extracts were analyzed by Western blotting for pULK1 (Ser757), ULK1, pTFEB (Ser122), TFEB, pS6 (Ser240/244), S6, S6K1, TSC1, GAPDH and tubulin. Quantifications of the blots are shown.

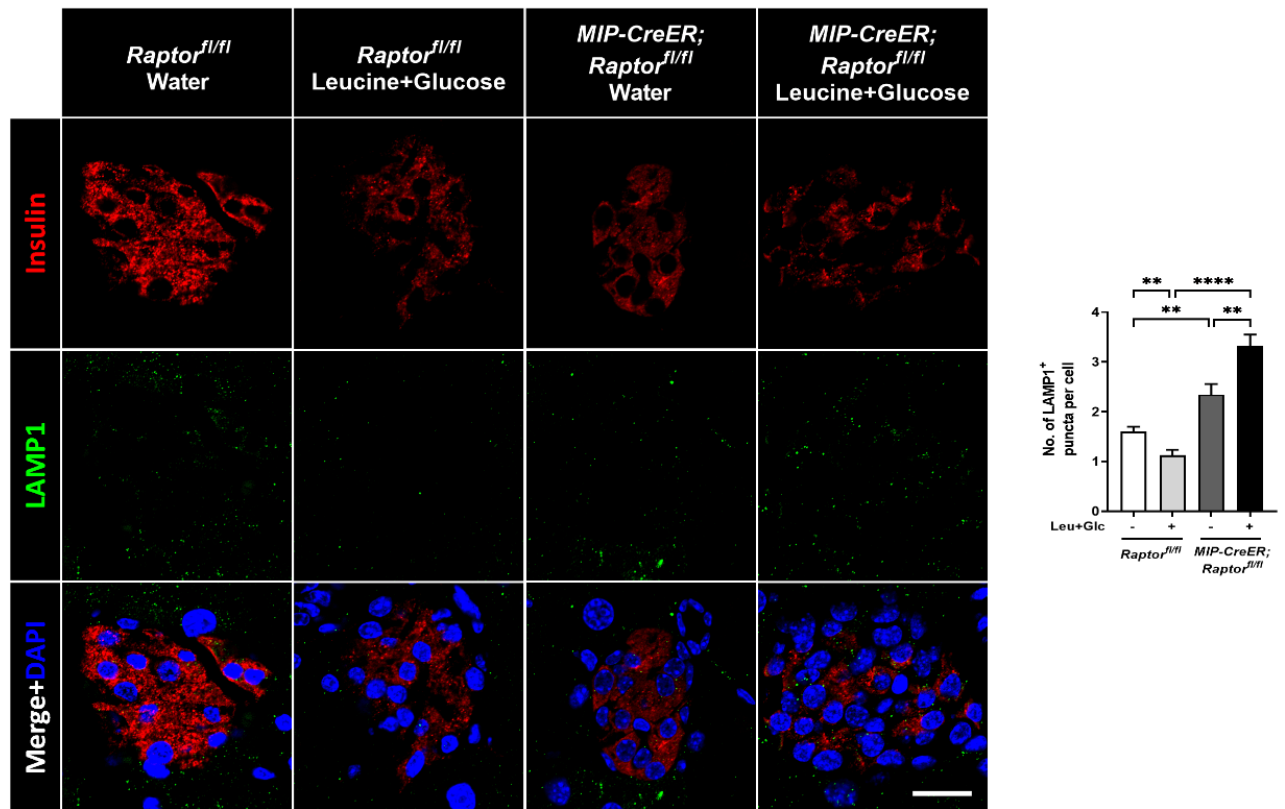

**Supplemental Figure 5. Effects of nutrients and mTORC1 on lysosome number in  $\beta$ -cells.** Control and  $\beta$ *Raptor*KO mice were fasted overnight and administered water or 2 g/kg glucose + 0.39 g/kg leucine by gavage, followed by removal of the pancreas 1 h later. Pancreatic sections were immunostained for insulin and LAMP1. The number of LAMP1<sup>+</sup> puncta in  $\beta$ -cells was quantified. Scale bar: 20  $\mu$ m. n=2 separate experiments, 210-375 cells per treatment were counted.



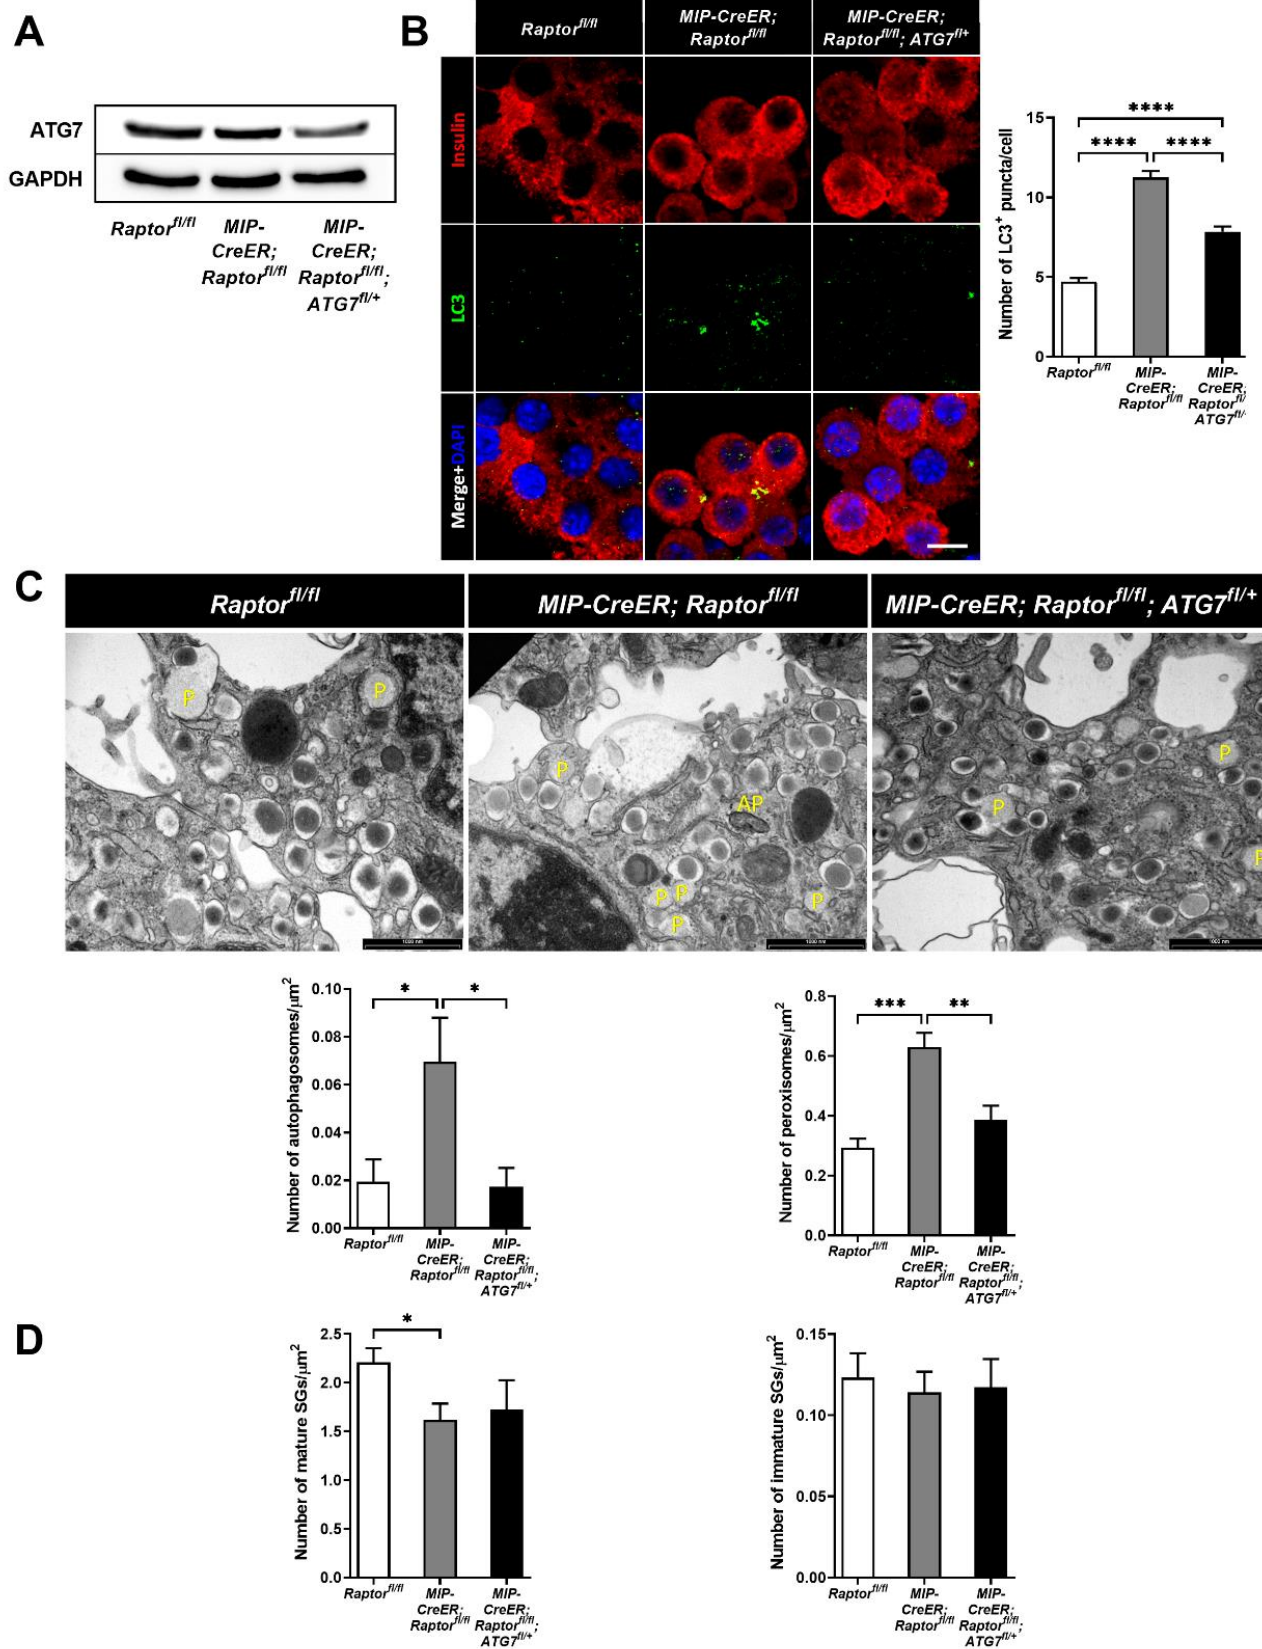



**Supplemental Figure 6: Effects of inhibiting mTORC1 and of heterozygous *Atg7* KO on autophagy and  $\beta$ -cell ultrastructure.** Islets were isolated from control (*MIP-CreER*),  $\beta$ *Raptor* KO (*MIP-CreER*; *Raptor*<sup>fl/fl</sup>) and  $\beta$ *Raptor* KO, *Atg7*<sup>+/-</sup> mice (*MIP-CreER*; *Raptor*<sup>fl/fl</sup>; *ATG7*<sup>fl/+</sup>). **(A)** Western blotting for ATG7 and GAPDH (n=2). **(B)** Dispersed islets were stained for insulin and LC3B followed by confocal microscope analysis and quantification of the number of LC3<sup>+</sup> puncta in  $\beta$ -cells. Scale bar: 10  $\mu$ m. n=3 separate experiments, 350-1050 cells per group were counted. **(C-D)** TEM analysis on islets from control (*Raptor*<sup>fl/fl</sup>), *MIP-CreER*; *Raptor*<sup>fl/fl</sup> and *MIP-CreER*; *Raptor*<sup>fl/fl</sup>; *Atg7*<sup>fl/+</sup> mice. Scale bar: 1000 nm **(C)**. Quantifications of the number of autophagosomes and peroxisomes per cell and of mature and young secretory granules **(D)**. n= 7-19 cells per pancreas from three mice. AP, autophagosome, P, peroxisome.

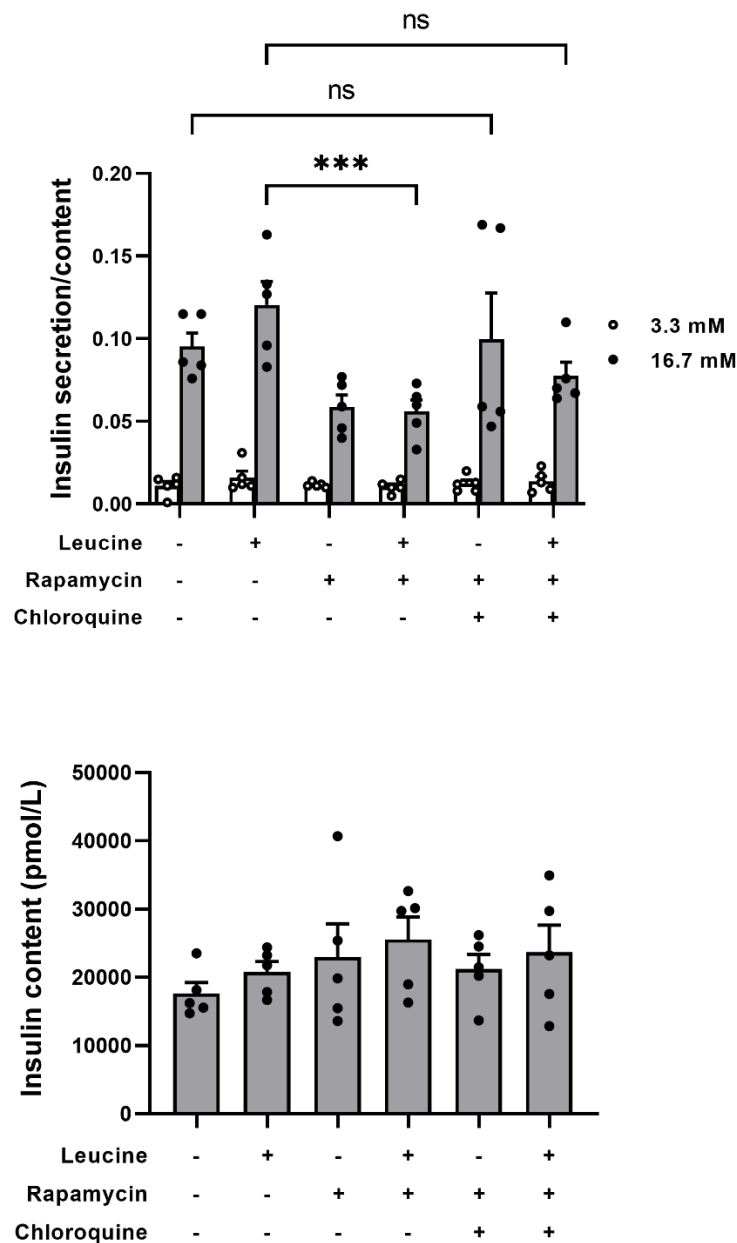

**Supplemental Figure 7: Effects of acute exposure to nutrients, rapamycin and chloroquine (CQ) on insulin secretion in human islets.** Islets were pre-incubated at 3.3 mmol/l glucose for 1 h and then incubated at 3.3 mmol/l glucose for 45 min followed by 16.7 mmol/l glucose with or without 10 mmol/l leucine, 100 nmol/l rapamycin and/or 10  $\mu$ mol/l CQ for 45 min. Insulin secretion normalized to content is shown above and insulin content below.
