# Supplementary material
Source: publisher figshare collection journal article supplement (https://diabetesjournals.figshare.com/articles/dataset/_/17099846)
Supplement: Supplementary file 2 [file 1]

## Checklist for Reporting Human Islet Preparations Used in Research

Adapted from Hart NJ, Powers AC (2018) Progress, challenges, and suggestions for using human islets to understand islet biology and human diabetes. Diabetologia <https://doi.org/10.1007/s00125-018-4772-2>.

|                                                                                                                                                                                                                                                                        |                                                                                        |
|------------------------------------------------------------------------------------------------------------------------------------------------------------------------------------------------------------------------------------------------------------------------|----------------------------------------------------------------------------------------|
| <b>Manuscript DOI:</b> <a href="https://doi.org/10.2337/[insert manuscript submission number]">https://doi.org/10.2337/[insert manuscript submission number]</a> (Example, <a href="https://doi.org/10.2337/db18-1234">https://doi.org/10.2337/db18-1234</a> )         |                                                                                        |
| <b>Title:</b> The nutrient sensor mTORC1 regulates insulin secretion by modulating $\beta$ -cell autophagy                                                                                                                                                             |                                                                                        |
| <b>Author list:</b> Israeli T., Riahi Y., Garzon P., Louzada RA., Joao Pedro Werneck-de-Castro JP., Blandino-Rosano M., Yeroslaviz-Stolper R., Kadosh L., Tornovsky-Babeay S., Hacker G., Israeli N., Agmon O., Tirosh B., Cerasi E., Bernal-Mizrachi E., Leibowitz G. |                                                                                        |
| <b>Corresponding author:</b> Gil Leibowitz MD                                                                                                                                                                                                                          | <b>Email address:</b> <a href="mailto:gleib@hadassah.org.il">gleib@hadassah.org.il</a> |

| Islet preparation     | 1           | 2           | 3           | 4 | 5 | 6 | 7 | 8 <sup>a</sup> |
|-----------------------|-------------|-------------|-------------|---|---|---|---|----------------|
| MANDATORY INFORMATION |             |             |             |   |   |   |   |                |
| Unique identifier     | HP-21161-01 | HP-21203-01 | HP-21216-01 |   |   |   |   |                |
| Donor age (years)     | 43          | 25          | 54          |   |   |   |   |                |

|                                                                             |            |            |            |  |  |  |  |  |
|-----------------------------------------------------------------------------|------------|------------|------------|--|--|--|--|--|
| Donor sex (M/F)                                                             | M          | M          | F          |  |  |  |  |  |
| Donor BMI (kg/m <sup>2</sup> )                                              | 25.5       | 26.5       | 31.8       |  |  |  |  |  |
| Donor HbA <sub>1c</sub> or other measure of blood glucose control           | 5.4%       | 5.8%       | 5.8        |  |  |  |  |  |
| Origin/source of islets <sup>b</sup>                                        | Prodo Labs | Prodo Labs | Prodo Labs |  |  |  |  |  |
| Islet isolation centre                                                      | Prodo Labs | Prodo Labs | Prodo Labs |  |  |  |  |  |
| Donor history of diabetes? Yes/No                                           | No         | No         | No         |  |  |  |  |  |
| <b>If Yes, complete the next two lines if this information is available</b> |            |            |            |  |  |  |  |  |
| Diabetes duration (years)                                                   |            |            |            |  |  |  |  |  |
| Glucose-lowering therapy at time of death <sup>c</sup>                      |            |            |            |  |  |  |  |  |

| RECOMMENDED INFORMATION |             |             |        |  |  |  |  |  |
|-------------------------|-------------|-------------|--------|--|--|--|--|--|
| Donor cause of death    | Head trauma | Head trauma | Stroke |  |  |  |  |  |

|                                                                                   |                                 |                         |                         |  |  |  |  |  |
|-----------------------------------------------------------------------------------|---------------------------------|-------------------------|-------------------------|--|--|--|--|--|
| Warm ischaemia time (h)                                                           |                                 |                         |                         |  |  |  |  |  |
| Cold ischaemia time (h)                                                           |                                 |                         |                         |  |  |  |  |  |
| Estimated purity (%)                                                              | 90                              | 95                      | 95                      |  |  |  |  |  |
| Estimated viability (%)                                                           | 95                              | 95                      | 95                      |  |  |  |  |  |
| Total culture time (h) <sup>d</sup>                                               | 4-5 days                        | 4-5 days                | 4-5 days                |  |  |  |  |  |
| Glucose-stimulated insulin secretion or other functional measurement <sup>e</sup> | GSIS, available in Fig 8 and S6 | GSIS, available in Fig8 | GSIS, available in Fig8 |  |  |  |  |  |
| Handpicked to purity? Yes/No                                                      | Yes                             | Yes                     | Yes                     |  |  |  |  |  |
| Additional notes                                                                  |                                 |                         |                         |  |  |  |  |  |

<sup>a</sup>If you have used more than eight islet preparations, please complete additional forms as necessary

<sup>b</sup>For example, IIDP, ECIT, Alberta IsletCore

<sup>c</sup>Please specify the therapy/therapies

<sup>d</sup>Time of islet culture at the isolation centre, during shipment and at the receiving laboratory

<sup>e</sup>Please specify the test and the results
